# Supplementary material
Source: PubMed Central journal article supplement (PMC6545853)
Supplement: 2019_216960-Disclosures_and_Contributions.pdf [file 2019_216960-Disclosures_and_Contributions.pdf]

Haematologica  
HAEMATOL/2019/216960  
Version 1

To induce or not to induce: the fight over hepcidin regulation

Veena Sangkhae and Elizabeta Nemeth

Disclosures: EN is a shareholder and scientific advisor of Intrinsic LifeSciences.

Contributions: Both authors wrote and edited the manuscript.
